# Supplementary material for: Vibrational properties of OH groups associated with divalent cations in corundum (α-Al2O3)
Source: Copernicus journal article supplement (doi:10.5194/ejm-35-873-2023), 2023-10-19
Supplement: Supplementary file 1 [file ejm-35-873-2023-supplement.zip]

## Electronic supplement

**Table S1:** theoretical and experimental vibrational frequencies of isolated water molecule

| mode                     | theoretical frequency<br>(this work) (cm <sup>-1</sup> ) | theoretical frequency<br>PAW <sup>a</sup> (cm <sup>-1</sup> ) | exp. (observed) frequency <sup>b</sup><br>(cm <sup>-1</sup> ) |
|--------------------------|----------------------------------------------------------|---------------------------------------------------------------|---------------------------------------------------------------|
| symmetric stretching     | 3808                                                     | 3836                                                          | 3756                                                          |
| antisymmetric stretching | 3696                                                     | 3723                                                          | 3657                                                          |
| bending                  | 1596                                                     | 1575                                                          | 1595                                                          |

cubic cell parameter:  $a=15.87 \text{ \AA}$ , single shifted k-point,  $d(\text{OH})=0.96781 \text{ \AA}$ ,  $(\text{HOH})=104.2735^\circ$

<sup>a</sup>T-Thienprasert, J., Boonchun, A., Reunchan, P., and Limpijumng, S.: Identification of hydrogen defects in  $\alpha\text{-Al}_2\text{O}_3$  by first-principles local vibration mode calculations, Phys. Rev. B, 95, 134103, 2017.

<sup>b</sup>Shimanouchi, T., Tables of Molecular Vibrational Frequencies Consolidated Volume I, National Bureau of Standards, 1972, 1-160.

**Table S2:** Selected theoretical and experimental vibrational properties of diaspoire:

| mode            | theoretical frequency<br>(cm <sup>-1</sup> ) | exp. (observed) frequency <sup>a</sup><br>(cm <sup>-1</sup> ) |
|-----------------|----------------------------------------------|---------------------------------------------------------------|
| B1u bending     | 1016                                         | 964                                                           |
| B3u bending     | 1082                                         | 1078                                                          |
| B2u bending     | 1181                                         | 1153                                                          |
| B1u bending x 2 | 2032                                         | 1985                                                          |
| B3u bending x 2 | 2164                                         | 2116                                                          |
| B2u bending x 2 | 2362                                         | 2340                                                          |
| B2u stretching  | 2947                                         | 2920                                                          |

orthorhombic cell parameters:  $a=4.426 \text{ \AA}$   $b=9.489 \text{ \AA}$   $c=2.866 \text{ \AA}$ , shifted 4x2x6 k-point grid,  $d(\text{OH})=1.008 \text{ \AA}$

<sup>a</sup>Delattre S., Balan E., Lazzeri M., Blanchard M., Guillaumet M., Beyssac O., Haussühl E., Winkler B., Salje E.K.H., Calas G. (2012) Experimental and theoretical study of the vibrational properties of diaspoire ( $\alpha\text{-AlOOH}$ ) Phys. Chem. Minerals 39, 93-102.

The supplement contains:

- .cif structure files of the defective corundum models
- Normalized eigendisplacements of optical modes. Atoms are ordered as in the corresponding .cif structure file. Displacement coordinates are reported in a cartesian reference frame (X,Y,Z) defined such as the hexagonal lattice vectors are  $a=(1,0,0)$ ,  $b=(-1/2, \sqrt{3}/2, 0)$   $c=(0,0,1)$ .
- .mov files with animations showing the 4 relevant modes (stretching, 2 bending, coupled mode) for the  $(\text{H}^+)_i$  model.
- Spectra from the GIA database as .txt files, in three folders containing spectra associated with '3161' series, Mg "Punsiri" stones and Ni-doped synthetics.
