# Supplementary material for: Vibrational properties of OH groups associated with divalent cations in corundum (α-Al2O3)
Source: Copernicus journal article supplement (doi:10.5194/ejm-35-873-2023), 2023-10-19
Supplement: Supplementary file 2 [file ejm-35-873-2023-supplement.zip]

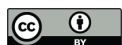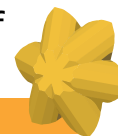

*Supplement of*

**Vibrational properties of OH groups associated with divalent cations in corundum ( $\alpha$ -Al<sub>2</sub>O<sub>3</sub>)**

**Michael C. Jollands et al.**

*Correspondence to:* Etienne Balan ([etienne.balan@sorbonne-universite.fr](mailto:etienne.balan@sorbonne-universite.fr))

- [ejm-35-873-2023-supplement-title-page.pdf](#)
- Supplements
  - .DS\_Store
  - Electronic supplement.pdf
  - GIA FTIR spectra
    - \* .DS\_Store
    - \* 3161
    - \* Mg punsiri
    - \* Nickel
  - cif\_files
    - \* (Be)Al-OHin.cif
    - \* (H+)i.cif
    - \* .DS\_Store
    - \* Co\_1.cif
    - \* Co\_2.cif
    - \* Co\_3.cif
    - \* Co\_4.cif
    - \* Cr\_1.cif
    - \* Cr\_2.cif
    - \* Cr\_3.cif
    - \* Cr\_4.cif
    - \* Fe\_1.cif
    - \* Fe\_2.cif
    - \* Fe\_3.cif
    - \* Fe\_4.cif
    - \* Mg\_1.cif
    - \* Mg\_2.cif

- \* Mg\_3.cif
- \* Mg\_4.cif
- \* Mn\_1.cif
- \* Mn\_2.cif
- \* Mn\_3.cif
- \* Mn\_4.cif
- \* Ni\_1.cif
- \* Ni\_2.cif
- \* Ni\_3.cif
- \* Ni\_4.cif
- mode\_files
  - \* (Be)Al\_OHin.modes
  - \* (H+)i.modes
  - \* .DS\_Store
  - \* Co\_1.modes
  - \* Co\_2.modes
  - \* Co\_3.modes
  - \* Co\_4.modes
  - \* Cr\_1.modes
  - \* Cr\_2.modes
  - \* Cr\_3.modes
  - \* Cr\_4.modes
  - \* Fe\_1.modes
  - \* Fe\_2.modes
  - \* Fe\_3.modes
  - \* Fe\_4.modes
  - \* Mg\_1.modes
  - \* Mg\_2.modes
  - \* Mg\_3.modes
  - \* Mg\_4.modes
  - \* Mn\_1.modes
  - \* Mn\_2.modes
  - \* Mn\_3.modes
  - \* Mn\_4.modes
  - \* Ni\_1.modes
  - \* Ni\_2.modes
  - \* Ni\_3.modes
  - \* Ni\_4.modes
- movies
  - \* (H+)i\_bending\_delta.mov
  - \* (H+)i\_bending\_gamma.mov
  - \* (H+)i\_coupled\_mode.mov
  - \* (H+)i\_stretching.mov

The copyright of individual parts of the supplement might differ from the article licence.
